# Supplementary material for: Titin governs myocardial passive stiffness with major support from microtubules and actin and the extracellular matrix
Source: Springer Nature journal article supplement (doi:10.1038/s44161-023-00348-1), 2023-10-26
Supplement: MOESM1 [file 44161_2023_348_MOESM1_ESM.pdf]

# **Titin governs myocardial passive stiffness with major support from microtubules and actin and the extracellular matrix**

---

In the format provided by the  
authors and unedited

## Supplementary Tables

**Supplementary Table 1. Titin-actin passive force interaction statistics.**

| <b>IFs/Desmin<br/>passive force<br/>contribution</b><br><b>mean±SEM (n)</b> | <b>Elastic (%)</b>                                                    |                                                                       |                                           | <b>Viscous (%)</b>                                                    |                                                                       |                                           |
|-----------------------------------------------------------------------------|-----------------------------------------------------------------------|-----------------------------------------------------------------------|-------------------------------------------|-----------------------------------------------------------------------|-----------------------------------------------------------------------|-------------------------------------------|
|                                                                             | Actin severing<br>1 <sup>st</sup> , titin<br>cleavage 2 <sup>nd</sup> | Titin cleavage<br>1 <sup>st</sup> , actin<br>severing 2 <sup>nd</sup> | Tukey's mult.<br>comparison<br>(P value)  | Actin severing<br>1 <sup>st</sup> , titin<br>cleavage 2 <sup>nd</sup> | Titin cleavage<br>1 <sup>st</sup> , actin<br>severing 2 <sup>nd</sup> | Tukey's mult.<br>comparison<br>(P value)  |
| Hom                                                                         | 19 ± 1 (12)                                                           | 15 ± 1 (11)                                                           | 0.068                                     | 14 ± 2 (12)                                                           | 8 ± 1 (11)                                                            | 0.288                                     |
| <b>Titin passive<br/>force<br/>contribution</b><br><b>mean±SEM (n)</b>      | <b>Elastic (%)</b>                                                    |                                                                       |                                           | <b>Viscous (%)</b>                                                    |                                                                       |                                           |
|                                                                             | Actin present                                                         | Actin severed                                                         | 2-tailed<br>Student's t-test<br>(P value) | Actin present                                                         | Actin severed                                                         | 2-tailed<br>Students t-test<br>(P value)  |
| Hom                                                                         | 78 ± 2 (11)                                                           | 73 ± 1 (12)                                                           | <b>0.031</b>                              | 86 ± 2 (11)                                                           | 76 ± 4 (12)                                                           | <b>0.026</b>                              |
| Wt                                                                          | 1 ± 2 (7)                                                             | 0 ± 5 (8)                                                             | 0.431                                     | 13 ± 3 (7)                                                            | 0 ± 13 (8)                                                            | 0.362                                     |
| <b>Actin passive<br/>force<br/>contribution</b><br><b>mean±SEM (n)</b>      | <b>Elastic (%)</b>                                                    |                                                                       |                                           | <b>Viscous (%)</b>                                                    |                                                                       |                                           |
|                                                                             | Titin present                                                         | Titin cleaved                                                         | 2-tailed<br>Student's t-test<br>(P value) | Titin present                                                         | Titin cleaved                                                         | 2-tailed<br>Student's t-test<br>(P value) |
| Hom                                                                         | 30 ± 3 (12)                                                           | 28 ± 4 (11)                                                           | 0.888                                     | 38 ± 4 (12)                                                           | 44 ± 9 (11)                                                           | 0.522                                     |
| Wt                                                                          | 35 ± 4 (8)                                                            | 46 ± 2 (7)                                                            | 0.054                                     | 40 ± 3 (8)                                                            | 32 ± 6 (7)                                                            | 0.2148                                    |

One-way ANOVA performed on all 4 treatment conditions (Hom+TEVp, Hom+TEVp +TL40, Hom+ TL40, Hom +TL40+ TEVp) followed by Tukey's multiple comparisons test for the statistics specific for the IFs/Desmin contribution.

**Supplementary Table 2. Relative contributions of different structural elements to myocardial stiffness.**

| <b>Element</b> | <b>Elastic force (% of total)</b> |                       | <b>Element</b> | <b>Viscous force (% of total)</b> |                       |
|----------------|-----------------------------------|-----------------------|----------------|-----------------------------------|-----------------------|
|                | Low strain<br>(10 %)              | High strain<br>(20 %) |                | Low strain<br>(10 %)              | High strain<br>(20 %) |
| MTs            | <b>21.7</b>                       | <b>13.4</b>           | MTs            | <b>34.8</b>                       | <b>27.2</b>           |
| Sarcolemma     | <b>&lt;0.1</b>                    | <b>12.3</b>           | Sarcolemma     | <b>&lt;0.1</b>                    | <b>&lt;0.1</b>        |
| Titin          | <b>54.9</b>                       | <b>35.8</b>           | Titin          | <b>28.4</b>                       | <b>25.5</b>           |
| Actin          | <b>23.3</b>                       | <b>17.9</b>           | Actin          | <b>22.0</b>                       | <b>12.4</b>           |
| ECM            | <b>&lt;0.1</b>                    | <b>16.7</b>           | ECM            | <b>14.8</b>                       | <b>27.8</b>           |
| IFs/desmin     |                                   | <b>3.8</b>            | IFs/desmin     |                                   | <b>7.1</b>            |

Values were determined from fitted experimental curves (Fig. 1e and f, Fig. 2d and e, Fig. 3b and c, and Fig. 4d and f) as well as the isolated cardiomyocyte data (Fig. 5b and j). Sarcolemma after the disruption of the microtubules (MTs, Fig 2d and e) was used to maintain the ‘musical chairs’ approach and as the loss of viscous force in the native left ventricular fiber bundle is likely due to MTs breakdown that cannot be accurately quantified. All data was corrected for preparation type (native/pre-permeabilized) and adjusted to consider tensegrity and experimental error. ECM and IFs (desmin) could not be distinguished from one another at the low strain. ECM, extracellular matrix; IFs, intermediate filaments.

**Supplementary Table 3. Antibodies**

| Target antigen                                             | Vendor or Source            | Catalog #          | Clone number | Working concentration             |
|------------------------------------------------------------|-----------------------------|--------------------|--------------|-----------------------------------|
| Anti-actinin alpha 2, mouse monoclonal                     | Sigma                       | Cat. #EA-53        | EA-53        | IF '(1:100)'                      |
| Anti-HaloTag, rabbit polyclonal                            | Promega                     | Cat. #G928A        | -            | IF '(1:100)'                      |
| Anti-titin, TTN5 (I20-22), rabbit polyclonal               | Myomedix, Mannheim, Germany | Cat. #TTN-5        | -            | IF '(1:400)'<br>WB '(1:8000)'     |
| anti- $\alpha$ -tubulin, mouse monoclonal                  | DSHB                        | Cat. #EA1          | EA1          | IF '(1:100)'                      |
| anti-desmin, mouse monoclonal                              | Dako                        | Cat. #Dako M 0760  | D33          | IF '(1:100)'                      |
| TTN-I/A (MIR), rabbit polyclonal                           | Myomedix                    | TTN-6              | -            | WB '(1:20000)'                    |
| Cy3 affinipure goat anti-rabbit IgG, goat polyclonal       | Jackson ImmunoResearch      | Cat. # 111-165-003 | -            | IF '(1:400)", secondary antibody  |
| Alexa 488 affinipure goat anti-mouse IgG, goat polyclonal  | Jackson ImmunoResearch      | Cat. # 115-546-146 | -            | IF '(1:400)", secondary antibody  |
| Alexa 647 affinipure goat anti-rabbit IgG, goat polyclonal | Jackson ImmunoResearch      | Cat. # 111-606-047 | -            | IF '(1:400)", secondary antibody  |
| Anti-rabbit IgG 1.4 nm nanogold, goat polyclonal           | Nanoprobes                  | Cat. # 2003        | -            | IEM '(1:100)", secondary antibody |
| Goat IgG anti-rabbit IgG (H+L chain)-HRP                   | OriGene (Acris)             | Cat. #R1364HRP     | -            | WB '(1:1000)' secondary antibody  |
